# Supplementary material for: Targeting the local tumor microenvironment with vaccinia virus expressing B7.1 for the treatment of melanoma
Source: JCI journal article supplement (doi:10.1172/jci24624), 2005-06-04
Supplement: sd1 [file 1]

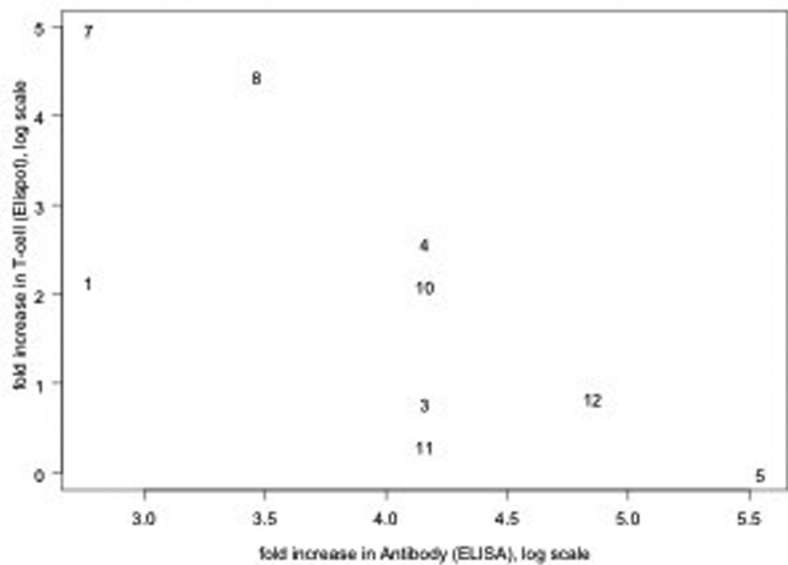

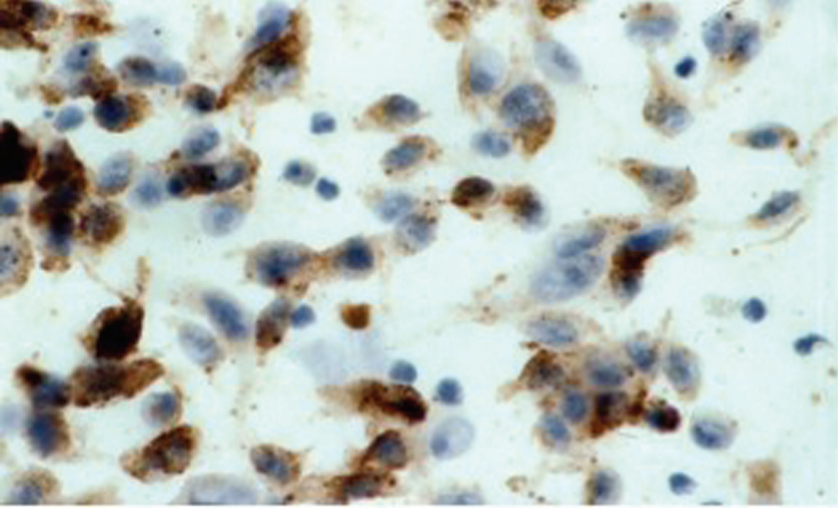

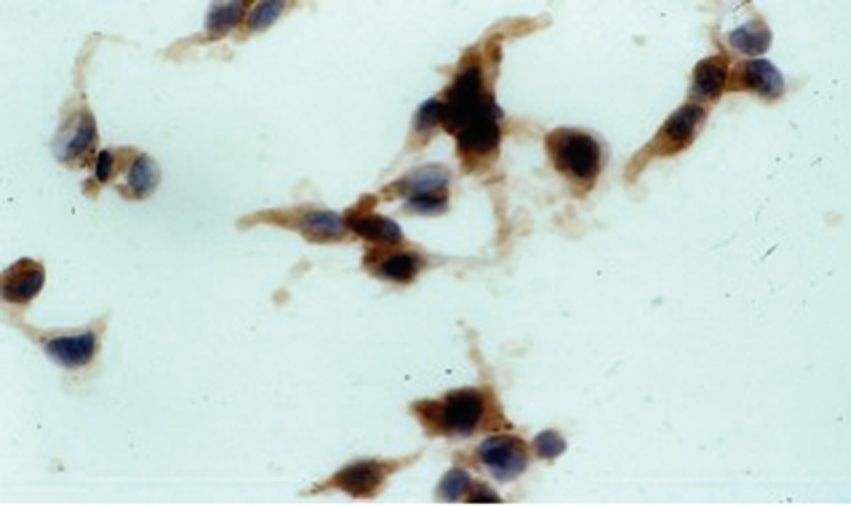

**Supplemental Figure 1.** Negative correlation between anti-vaccinia antibody titers as determined by ELISA and T cell responses as determined by IFN- $\gamma$  ELISPOT assay. The n-fold increase in antibody titers against the n-fold increase in T cell responses showed a negative correlation of  $-0.45$  with 95% CI:  $-0.93$  to  $-0.28$ .

**Supplemental Figure 2.** Melanoma cells were identified in fine needle aspirate cytopins derived from index lesions in patients enrolled on the rV-B7.1 clinical trial. The tumor cells expressed gp100 (a) and Melan-A/MART-1 (b) as shown after immunohistochemical staining with HMB45 or Melan-A/MART-1 monoclonal antibodies as described in the Methods. A granular pattern with brown as a positive stain (counterstain is blue) is demonstrated (magnification, 40X).

**Supplemental Table 1. Relative quantification of average CD8, IFN- $\gamma$  and IL-10 transcription levels reported as comparative  $C_T$  values in pre-vaccination RNA samples subtracted by the average PGK-1 endogenous control  $C_T$  value for individual patients, and thus shown as  $\Delta C_T$ . The samples were taken from index lesions of one patient with a stable lesion (SD), two with partially regressing lesions (PR), and two with lesions demonstrating progressive disease (PD) after vaccination.**

| Pt. # | Target<br>Response | $\Delta C_T$ CD8 | $\Delta C_T$ IFN-<br>— | $\Delta C_T$ IL-10 |
|-------|--------------------|------------------|------------------------|--------------------|
| 3     | SD                 | $3.1 \pm 0.05$   | $8.9 \pm 0.07$         | $7.6 \pm 0.07$     |
| 4     | PR                 | $8.8 \pm 0.17$   | 0                      | $15.8 \pm 0.11$    |
| 5     | PR                 | $5.2 \pm 0.08$   | $12.2 \pm 0.1$         | $11.6 \pm 0.09$    |
| 7     | PD                 | $3.4 \pm 0.08$   | $8.2 \pm 0.07$         | ND                 |
| 9     | PD                 | $2.6 \pm 0.06$   | $8.9 \pm 0.09$         | $9.2 \pm 0.07$     |
